# Supplementary material
Source: publisher figshare collection journal article supplement (https://acs.figshare.com/ndownloader/files/5320321)
Supplement: Supplementary file 1 [file 5320321]

## Supporting Information

### Mechanisms for High Selectivity in Hydrodeoxygenation of 5-Hydroxymethylfurfural over PtCo Nanocrystals

Jing Luo<sup>a,†</sup>, Hongseok Yun<sup>b,†</sup>, Alexander V. Mironenko<sup>c,†</sup>, Konstantinos Goulas<sup>c</sup>, Jennifer D. Lee<sup>b</sup>, Matteo Monai<sup>d</sup>, Cong Wang<sup>a</sup>, Vassili Vorotnikov<sup>c</sup>, Christopher B. Murray<sup>b</sup>, Dionisios G. Vlachos<sup>c</sup>, Paolo Fornasiero<sup>d</sup> and Raymond J. Gorte<sup>a,\*</sup>

<sup>a</sup>Department of Chemical & Biomolecular Engineering, University of Pennsylvania  
Philadelphia, PA 19104, United States

<sup>b</sup>Department of Chemistry, University of Pennsylvania  
Philadelphia, PA 19104, United States

<sup>c</sup>Department of Chemical & Biomolecular Engineering, University of Delaware  
Newark, DE 19716, United States

<sup>d</sup>Department of Chemical and Pharmaceutical Sciences, University of Trieste  
Trieste, 34127, Italy

† These authors contribute equally.

\* Corresponding Author: Raymond J. Gorte

Email: [gorte@seas.upenn.edu](mailto:gorte@seas.upenn.edu)

**Table S1.** Yields of partially hydrogenated compounds for HDO of HMF at 120 °C and 33 bar.

| Catalyst                        | W/F<br>(g·min/mL) | 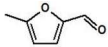 |  |  |  |  |  |
|---------------------------------|-------------------|-----------------------------------------------------------------------------------|-----------------------------------------------------------------------------------|-----------------------------------------------------------------------------------|-----------------------------------------------------------------------------------|------------------------------------------------------------------------------------|-------------------------------------------------------------------------------------|
| Pt                              | 0.0625            | 1.3                                                                               | 0                                                                                 | 3.7                                                                               | 3.8                                                                               | 25.4                                                                               | 3.4                                                                                 |
|                                 | 0.25              | 0                                                                                 | 0                                                                                 | 2.1                                                                               | 2.7                                                                               | 17.0                                                                               | 2.7                                                                                 |
|                                 | 1                 | 0                                                                                 | 0                                                                                 | 0                                                                                 | 0                                                                                 | 6.8                                                                                | 0                                                                                   |
| Pt <sub>3</sub> Co              | 0.0625            | 0.8                                                                               | 0                                                                                 | 4.8                                                                               | 3.2                                                                               | 23.5                                                                               | 2.6                                                                                 |
|                                 | 0.25              | 0                                                                                 | 1.6                                                                               | 2.1                                                                               | 2.3                                                                               | 11.9                                                                               | 2.9                                                                                 |
|                                 | 1                 | 0                                                                                 | 0.8                                                                               | 0                                                                                 | 0                                                                                 | 5.2                                                                                | 0                                                                                   |
| Pt <sub>3</sub> Co <sub>2</sub> | 0.0625            | 3.0                                                                               | 0                                                                                 | 2.6                                                                               | 4.0                                                                               | 10.1                                                                               | 3.1                                                                                 |
|                                 | 0.25              | 2.3                                                                               | 2.4                                                                               | 11.5                                                                              | 3.7                                                                               | 14.2                                                                               | 4.0                                                                                 |
|                                 | 1                 | 1.7                                                                               | 6.3                                                                               | 11.4                                                                              | 3.6                                                                               | 9.2                                                                                | 0                                                                                   |

**Table S2.** Particle size distribution of Pt and Pt<sub>3</sub>Co<sub>2</sub> nanocrystals.

|                         | <b>Pt nanocrystal size (nm)</b> | <b>Pt<sub>3</sub>Co<sub>2</sub> nanocrystal size (nm)</b> |
|-------------------------|---------------------------------|-----------------------------------------------------------|
| As-synthesized          | 2.4 ± 0.2                       | 3.7 ± 0.3                                                 |
| After surface treatment | 2.5 ± 0.3                       | 3.7 ± 0.3                                                 |
| After reaction          | 3.5 ± 0.7                       | 3.8 ± 0.4                                                 |

**Table S3.** Fitting of the EXAFS Pt and Co spectra. All distances in Angstroms.

| Co EXAFS                                 | Pt <sub>3</sub> Co <sub>2</sub> -400 | Pt edge EXAFS                            | Pt <sub>3</sub> Co <sub>2</sub> -400 | Pt <sub>3</sub> Co <sub>2</sub> -250 |
|------------------------------------------|--------------------------------------|------------------------------------------|--------------------------------------|--------------------------------------|
| Co-Pt distance                           | 2.645                                | Pt-Co distance                           | 2.645 ± 0.005                        | 2.646<br>± 0.006                     |
| Co-Co distance                           | 2.554 ±<br>0.013                     | Pt-Pt distance                           | 2.730 ± 0.003                        | 2.743<br>± 0.002                     |
| Co-O distance                            | -                                    | -                                        | -                                    | -                                    |
| Co-Co CN                                 | 7.69 ± 1.93                          | Pt-Pt CN                                 | 8.02 ± 0.62                          | 8.98 ± 0.57                          |
| Co-Pt CN                                 | 6.27 ± 0.98                          | Pt-Co CN                                 | 3.84 ± 0.47                          | 2.88 ± 0.44                          |
| Co-O CN                                  | -                                    | -                                        | -                                    | -                                    |
| R <sup>2</sup>                           | 0.007                                | R <sup>2</sup>                           | 0.002                                | 0.001                                |
| ΔE <sub>0</sub> (eV)                     | -7.60 ± 0.93                         | ΔE <sub>0</sub> (eV)                     | 6.47 ± 0.33                          | 6.32 ± 0.30                          |
| σ <sup>2</sup> Pt-Co (x10 <sup>4</sup> ) | 90                                   | σ <sup>2</sup> Pt-Co (x10 <sup>4</sup> ) | 90 ± 10                              | 85 ± 12                              |
| σ <sup>2</sup> Co-Co (x10 <sup>4</sup> ) | 171 ± 31                             | σ <sup>2</sup> Pt-Pt (x10 <sup>4</sup> ) | 65 ± 4                               | 54 ± 3                               |

**Table S4.** Metal dispersions of alumina supported catalysts after 250°C and 400°C reduction, assuming CO/Pt=1 and no CO adsorption on Co atoms.

| Sample                                                                | Dispersion (250°C reduction) | Dispersion (400°C reduction) |
|-----------------------------------------------------------------------|------------------------------|------------------------------|
| 1-wt% Pt/Al <sub>2</sub> O <sub>3</sub>                               | 19.4 %                       | 12.6%                        |
| 1-wt% Pt <sub>3</sub> Co <sub>2</sub> /Al <sub>2</sub> O <sub>3</sub> | 0 %                          | 8.8 %                        |

**Table S5.** DFT reaction energies and barriers on a Co<sub>3</sub>O<sub>2</sub>/Pt(111) honeycomb surface. Index numbers correspond to structures in Figure S5. Forces were converged at 0.2 eV/Å level due to slow convergence.

| Reaction                                                                                                       | #  | DFT reaction energy, eV | DFT reaction barrier, eV |
|----------------------------------------------------------------------------------------------------------------|----|-------------------------|--------------------------|
| <i>Hydrogen activation</i>                                                                                     |    |                         |                          |
| $\text{H}_2 + * = \text{H}_2^*$                                                                                | -  | -0.14                   | N/A                      |
| $\text{H}_2^* = \text{H}_{\text{Pt-Co}}^* - \text{H}_{\text{Pt-Co}}^*$                                         | 1  | -0.15                   | 0.68                     |
| $\text{H}_2^* = \text{H}_{\text{Pt-Co}}^* - \text{OH}_{\text{vac}}^*$                                          | 2  | -0.41                   | 1.19                     |
| $\text{H}_2^* = 2\text{OH}_{\text{vac}}^*$                                                                     | 3  | -0.86                   | 1.5                      |
| <i>Vacancy formation</i>                                                                                       |    |                         |                          |
| $\text{H}_{\text{Pt-Co}}^* - \text{H}_{\text{Pt-Co}}^* = \text{H}_{\text{Pt-Co}}^* - \text{OH}_{\text{vac}}^*$ | 4  | -0.29                   | 1.26                     |
| $\text{H}_{\text{Pt-Co}}^* - \text{OH}_{\text{vac}}^* = \text{H}_2\text{O}_{\text{vac}}^*$                     | 5  | +0.13                   | 1.15                     |
| $\text{H}_2\text{O}_{\text{vac}}^* = \text{H}_2\text{O} + *_{\text{vac}}$                                      | -  | +0.56                   | N/A                      |
| <i>HMF-to-HMMF conversion</i>                                                                                  |    |                         |                          |
| $\text{HMF} + 2\text{H}_{\text{Pt-Co}}^* = \text{HMF} - 2\text{H}_{\text{Pt-Co}}^*$                            | -  | -0.80                   | N/A                      |
| $\text{HMF} - 2\text{H}_{\text{Pt-Co}}^* = \text{BHMF}^*$                                                      | 6  | -0.56                   | 0.84                     |
| $\text{BHMF}^* = \text{BHMF} + *$                                                                              | -  | +0.91                   | N/A                      |
| $\text{BHMF}^* = \text{BHMFmOH}^* - \text{OH}^*$                                                               | 7  | +0.93                   | 1.19                     |
| $\text{BHMFmOH}^* - \text{OH}^* = \text{HMMF}^* - \text{O}^*$                                                  | 8  | -0.19                   | 0.17                     |
| $\text{HMMF}^* - \text{O}^* = \text{HMMF} + \text{O}^*$                                                        | -  | +0.78                   | N/A                      |
| <i>O removal</i>                                                                                               |    |                         |                          |
| $\text{H}_2 + \text{O}^* = \text{H}_2^* - \text{O}^*$                                                          | -  | -0.12                   | N/A                      |
| $\text{H}_2^* - \text{O}^* = \text{H}_{\text{Pt}}^* - \text{OH}^*$                                             | 9  | -1.21                   | 0.28 <sup>1</sup>        |
| $\text{H}_{\text{Pt}}^* - \text{OH}^* = \text{H}_2\text{O}^*$                                                  | 10 | -0.90                   | 0.23                     |
| $\text{H}_2\text{O}^* = \text{H}_2\text{O} + *$                                                                | -  | +0.41                   | N/A                      |
| <i>BHMF-to-HMMF conversion on a vacancy</i>                                                                    |    |                         |                          |
| $\text{BHMF} + *_{\text{vac}} = \text{BHMF}^*_{\text{vac}}$                                                    | -  | -1.32                   | N/A                      |
| $\text{BHMF}^*_{\text{vac}} = \text{BHMFmOH}^* - \text{OH}_{\text{vac}}^*$                                     | 11 | +0.10                   | N/A                      |
| $\text{BHMFmOH}^* - \text{OH}_{\text{vac}}^* = \text{HMMF}^*$                                                  | 12 | -0.63                   | N/A                      |
| $\text{HMMF}^* = \text{HMMF} + *$                                                                              | -  | +0.63                   | N/A                      |

Notation:

\* – intact honeycomb oxide surface;

$\text{H}_{\text{Pt-Co}}^*$  – hydrogen atom bound to Pt and Co atoms in a bridging configuration;

$\text{OH}_{\text{vac}}^*$  and  $\text{H}_2\text{O}_{\text{vac}}^*$  – OH and H<sub>2</sub>O adsorbed on a vacancy;

$\text{O}^*$ ,  $\text{OH}^*$ , and  $\text{H}_2\text{O}^*$  - O, OH, and H<sub>2</sub>O adsorbed on an intact honeycomb surface between two Co atoms in a bridging configuration;

$*_{\text{vac}}$  – honeycomb oxide with a vacancy;

$\text{H}_2^* - \text{O}^*$  –  $\text{O}^*$  species with a H<sub>2</sub> molecule physisorbed nearby over a Pt atom

HMF – 5-(hydroxymethyl)furfural;

$\text{HMF} - 2\text{H}_{\text{Pt-Co}}^*$  – HMF co-adsorbed with two  $\text{H}_{\text{Pt-Co}}^*$  atoms;

BHMF – 2,5-bis(hydroxymethyl)furan;

BHMFmOH\* - radical formed after removal of the hydroxyl side group from BHMF;

HMMF – 2-(hydroxymethyl)-5-methylfuran;

N/A – reaction barrier was not calculated

**Table S6.** Comparison of properties and numbers of surface atoms in Pt<sub>3</sub>Co<sub>2</sub> and Pt<sub>3</sub>Co NCs with a core/shell structure.

|                                                                      | Pt <sub>3</sub> Co <sub>2</sub> (core/shell) | Pt <sub>3</sub> Co (core/shell) |
|----------------------------------------------------------------------|----------------------------------------------|---------------------------------|
| Nanoparticle size                                                    | 3.7 nm                                       | 3.2 nm                          |
| Lattice constant                                                     | 3.87 Å <sup>1</sup>                          | 3.87 Å <sup>1</sup>             |
| Bulk Co fraction                                                     | 14.4 %                                       | 14.4 % <sup>2</sup>             |
| Total number of atoms                                                | 1827                                         | 1168                            |
| Number of surface atoms                                              | 662 <sup>3</sup>                             | 491 <sup>3</sup>                |
| Number of surface Co atoms                                           | 547 <sup>4</sup>                             | 405 <sup>4</sup>                |
| Number of surface Co atoms<br>available at given bulk Co<br>fraction | 547                                          | 184                             |

<sup>1</sup>Calculated from XRD; <sup>2</sup>Assumed to be the same as for Pt<sub>3</sub>Co<sub>2</sub>; <sup>3</sup>Calculated for a close-packed surface;

<sup>4</sup>Based on 70% of Co<sub>3</sub>O<sub>2</sub>-covered terrace sites and 30% of CoO-covered steps

**Table S7.** Comparison of estimated properties of three Pt<sub>3</sub>Co<sub>2</sub> NCs: an alloy core/surface Co<sub>3</sub>O<sub>2</sub> monolayer shell geometry, a Pt<sub>3</sub>Co<sub>2</sub> random alloy, and a Pt NC of the same size.

|                                       |                             | Pt <sub>3</sub> Co <sub>2</sub> (core/shell) | Pt <sub>3</sub> Co <sub>2</sub> (random alloy) | Pt                 |
|---------------------------------------|-----------------------------|----------------------------------------------|------------------------------------------------|--------------------|
| Nanoparticle size                     |                             | 3.7 nm                                       | 3.7 nm                                         | 3.7 nm             |
| Lattice constant                      |                             | 3.87 Å <sup>1</sup>                          | 3.77 Å <sup>2</sup>                            | 3.92 Å             |
| Bulk Co fraction                      |                             | 14.4 %                                       | 40 %                                           | -                  |
| Total number of atoms                 |                             | 1827                                         | 1983                                           | 1754               |
| Number of surface atoms               |                             | 662 (546 <sup>3</sup> )                      | 700                                            | 645                |
| Number of subsurface atoms            |                             | 524                                          | - <sup>4</sup>                                 | - <sup>4</sup>     |
| Dispersion                            |                             | 36.3 %                                       | 35.3 %                                         | 36.8 %             |
| Distribution of Co atoms in each part | Surface                     | 74.8 % <sup>3</sup>                          | 35.3 %                                         | -                  |
|                                       | Subsurface                  | 10.3 % <sup>3</sup>                          | - <sup>4</sup>                                 | -                  |
|                                       | Bulk                        | 14.9 % <sup>3</sup>                          | 64.7 %                                         | -                  |
| Distribution of Pt atoms in each part | Surface                     | 0 % <sup>3</sup>                             | 35.3 %                                         | 36.8 %             |
|                                       | Subsurface (under terraces) | 22.8 % <sup>3</sup>                          | - <sup>4</sup>                                 | - <sup>4</sup>     |
|                                       | Subsurface (under steps)    | 18.1 % <sup>3</sup>                          |                                                |                    |
|                                       | Bulk                        | 59.1 % <sup>3</sup>                          | 64.7 %                                         | 63.2 %             |
| Coordination numbers                  | Pt-Co                       | 2.92                                         | 4.38 <sup>5</sup>                              | - <sup>5</sup>     |
|                                       | Pt-Pt                       | 8.91                                         | 6.57 <sup>5</sup>                              | 10.90 <sup>5</sup> |
|                                       | Pt-M                        | 11.83                                        | 10.94 <sup>5</sup>                             | 10.90 <sup>5</sup> |

<sup>1</sup>Calculated based on XRD; <sup>2</sup>estimated based on the bulk composition and Vegard's law; <sup>3</sup>Assuming 70% of surface sites are present as a Co<sub>3</sub>O<sub>2</sub> honeycomb structure; <sup>4</sup>subsurface atoms are considered part of the bulk, due to identical coordination; <sup>5</sup>for the Pt<sub>3</sub>Co<sub>2</sub> random alloy and the Pt NC, CN<sub>total</sub> = 9 in the surface and CN<sub>total</sub> = 12 in the bulk.



**Table S8.** Calculation of the vacancy formation rate at conditions of kinetic measurements (160°C, 33 bar H<sub>2</sub>) and catalyst pretreatment/XAS conditions (250°C, 1 bar H<sub>2</sub>).

|                                                  | 250 °C, 1 bar H <sub>2</sub>           | 160 °C, 33 bar H <sub>2</sub>          |
|--------------------------------------------------|----------------------------------------|----------------------------------------|
| $\Delta G_{H_2,ads}$ , J/mol                     | $3.31 \cdot 10^4$                      | $2.16 \cdot 10^4$ *                    |
| $\Delta G_{O+H \rightarrow OH}^\ddagger$ , J/mol | $1.17 \cdot 10^5$                      | $1.17 \cdot 10^5$                      |
| $\theta_{2H}$                                    | $4.95 \cdot 10^{-4}$                   | $8.19 \cdot 10^{-2}$                   |
| $k_{O+H \rightarrow OH}$ , s <sup>-1</sup>       | $2.32 \cdot 10^1$                      | $6.42 \cdot 10^{-2}$                   |
| $r$ , s <sup>-1</sup>                            | <b><math>1.15 \cdot 10^{-2}</math></b> | <b><math>5.26 \cdot 10^{-3}</math></b> |

\*Gibbs free energy of reaction is given at 1 atm.

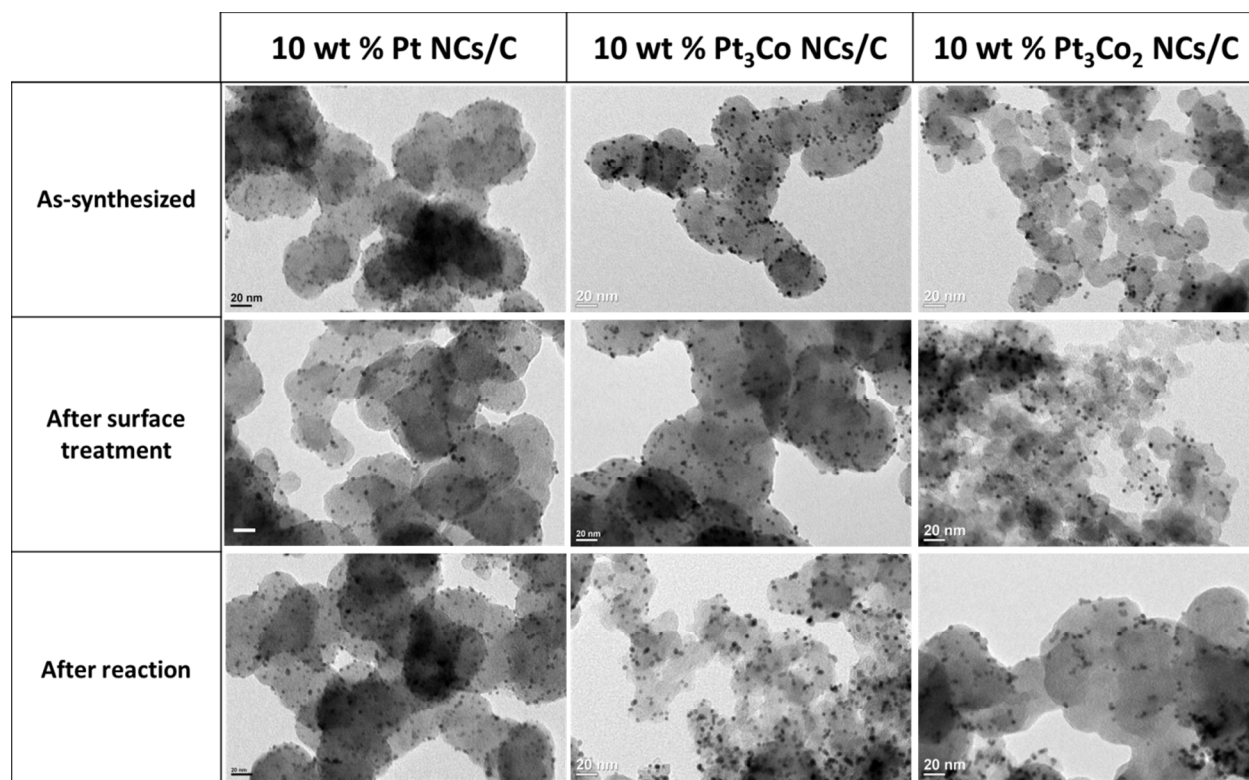

**Figure S1.** TEM images of as-synthesized NC catalyst on carbon support, after surface treatment, and after reaction.

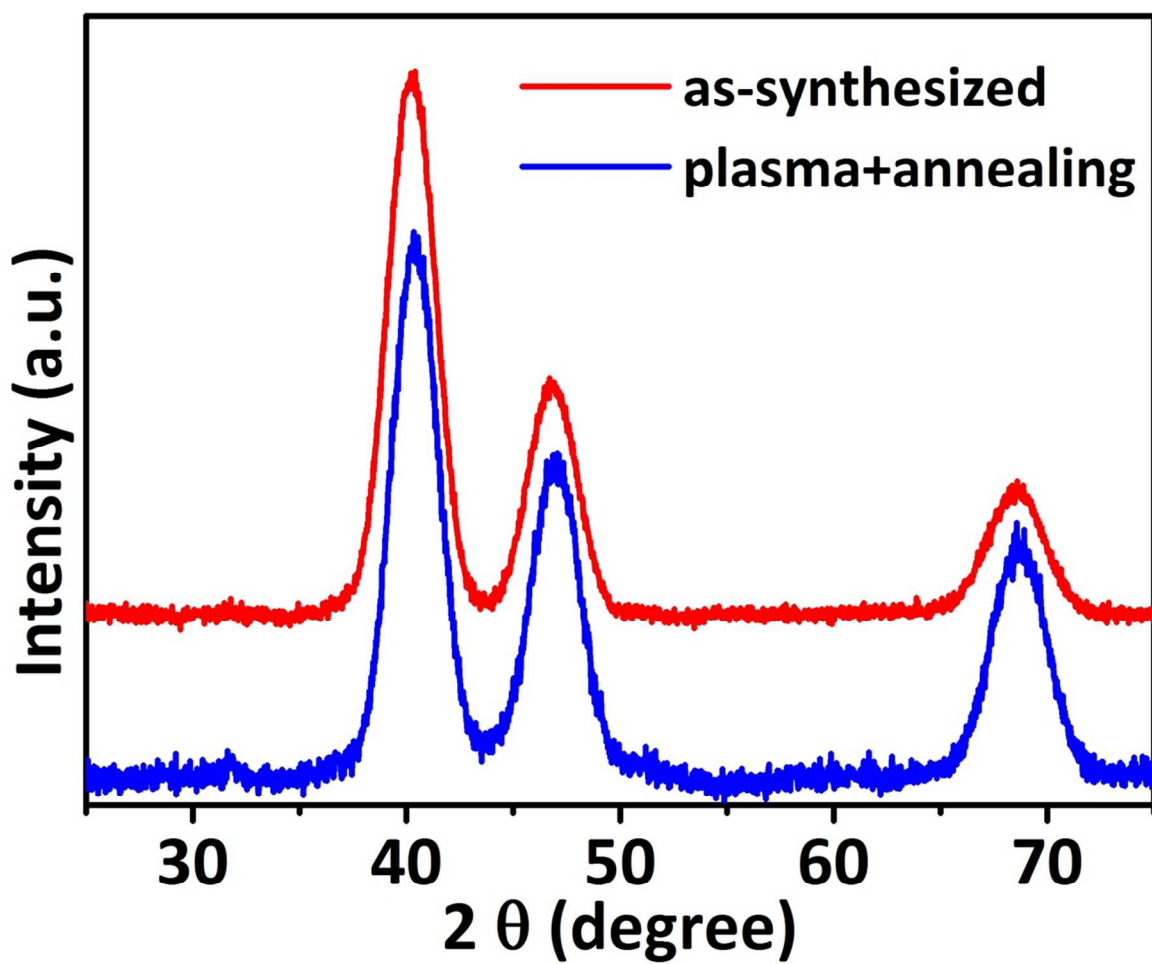

**Figure S2.** Wide angle x-ray scattering data of as-synthesized (red) and after surface cleaned (blue)  $\text{Pt}_3\text{Co}_2$  NCs.

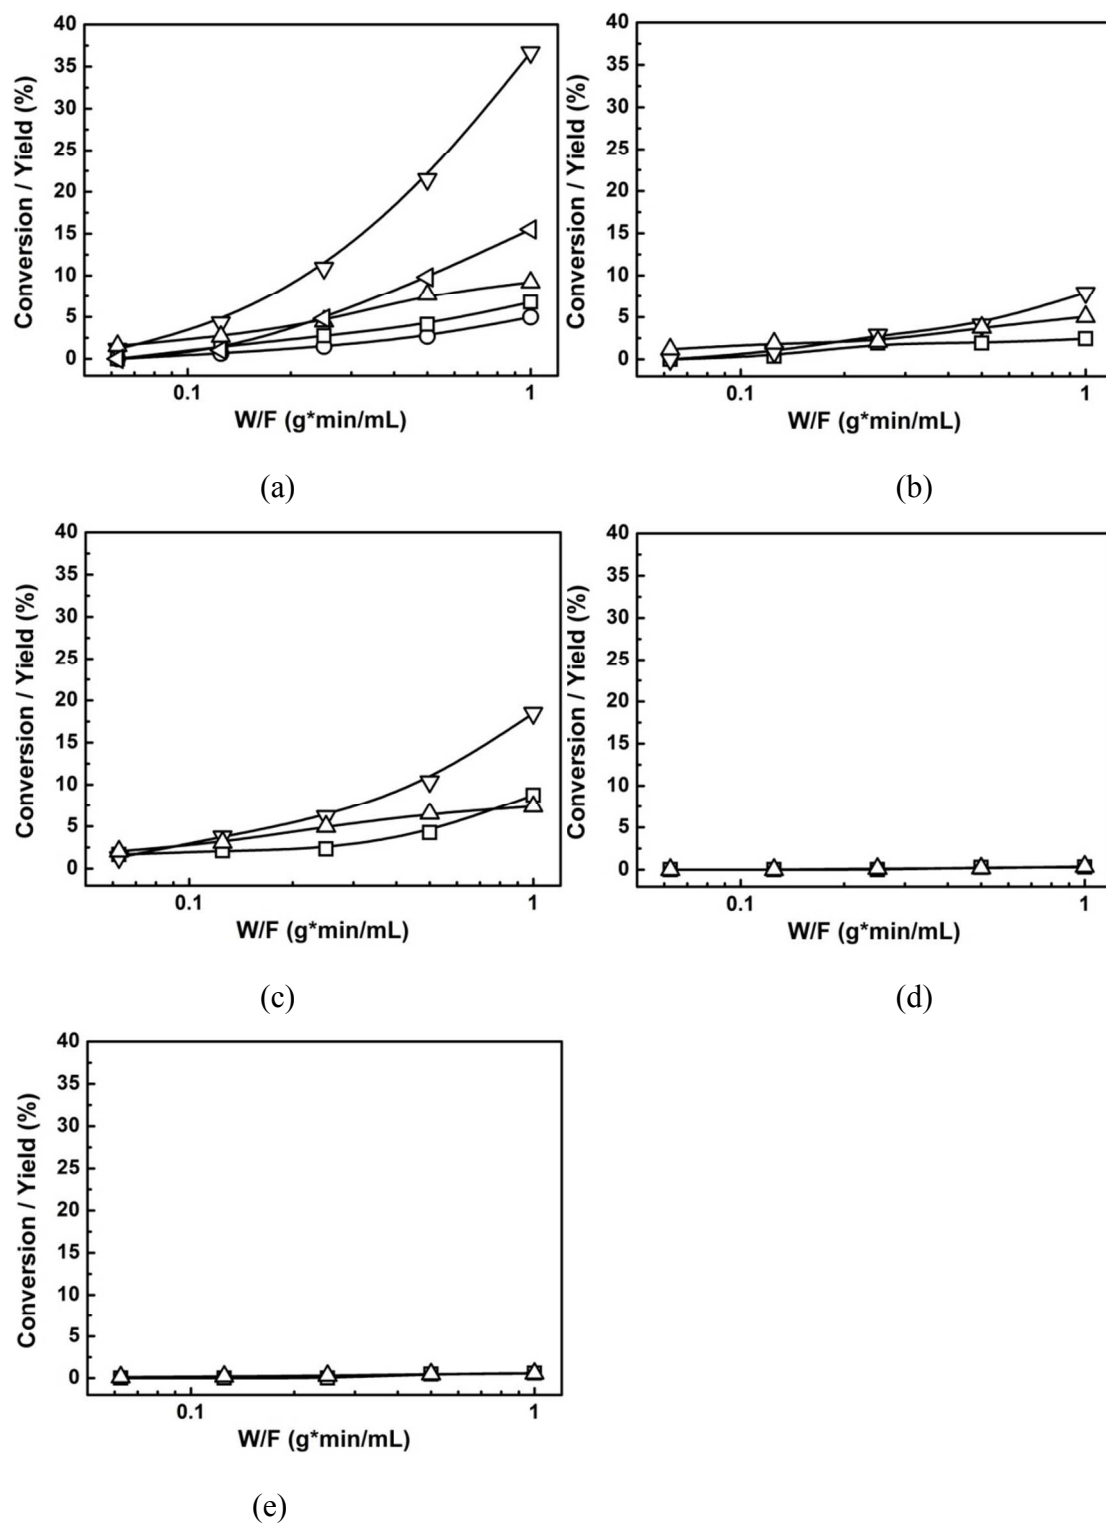

**Figure S3.** Yields of over-hydrogenated compounds as a function of space time at 33 bar: (a) 10-wt% Pt/C at 120 °C (b) 10-wt% Pt<sub>3</sub>Co/C at 120 °C, (c) 10-wt% Pt<sub>3</sub>Co/C at 160 °C; (d) 10-wt% Pt<sub>3</sub>Co<sub>2</sub>/C at 120 °C, (e) 10-wt% Pt<sub>3</sub>Co<sub>2</sub>/C at 160 °C. ( $\square$ ) DMTHF, ( $\nabla$ ) 2-hexanone, 2-hexanol and 2-propoxyhexane, ( $\triangle$ ) 2,5-hexandione, 2,5-dipropoxyhexane, ( $\circ$ ) hexane, ( $\triangleleft$ ) unidentified

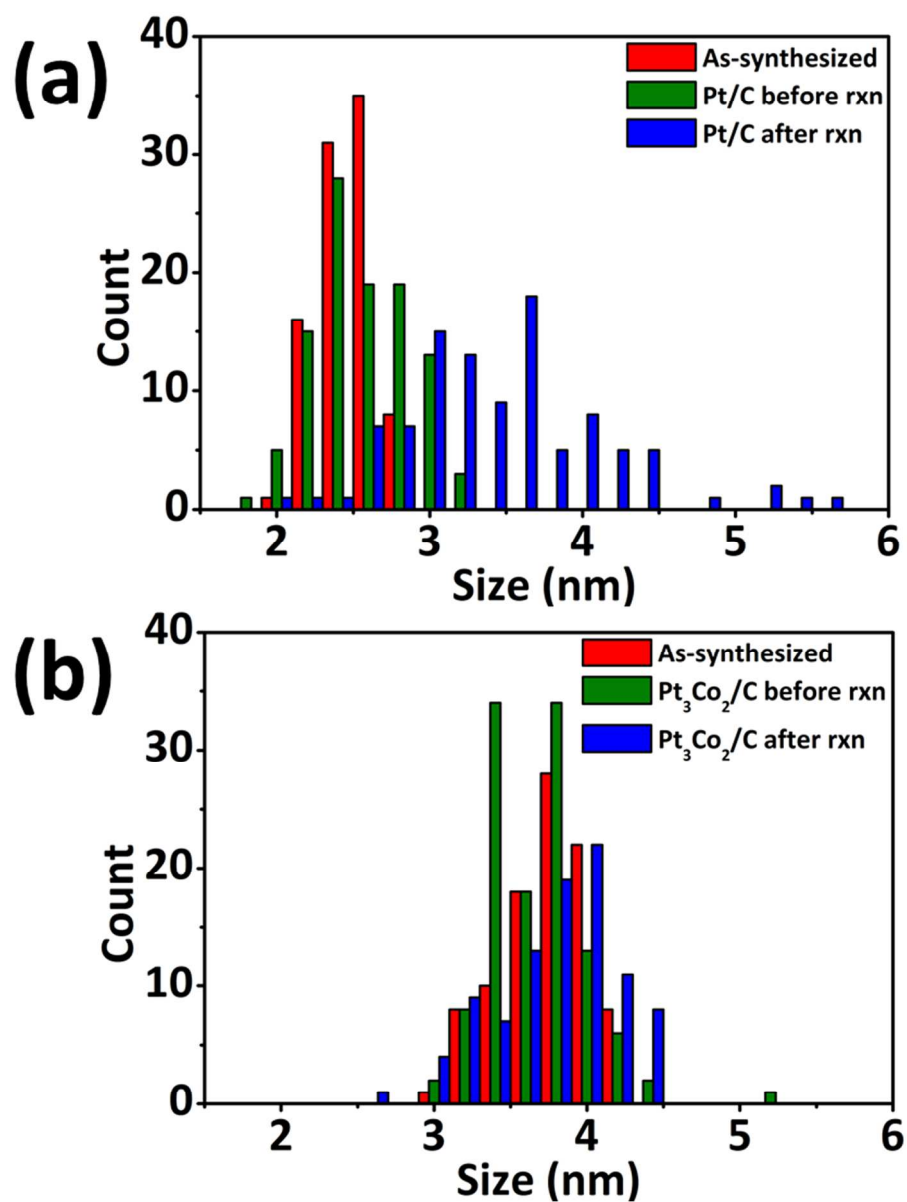

**Figure S4.** The particle size distribution of (a) Pt and (b)  $\text{Pt}_3\text{Co}_2$  nanocrystals before and after the hydrodeoxygenation reactions.

*Hydrogen activation*

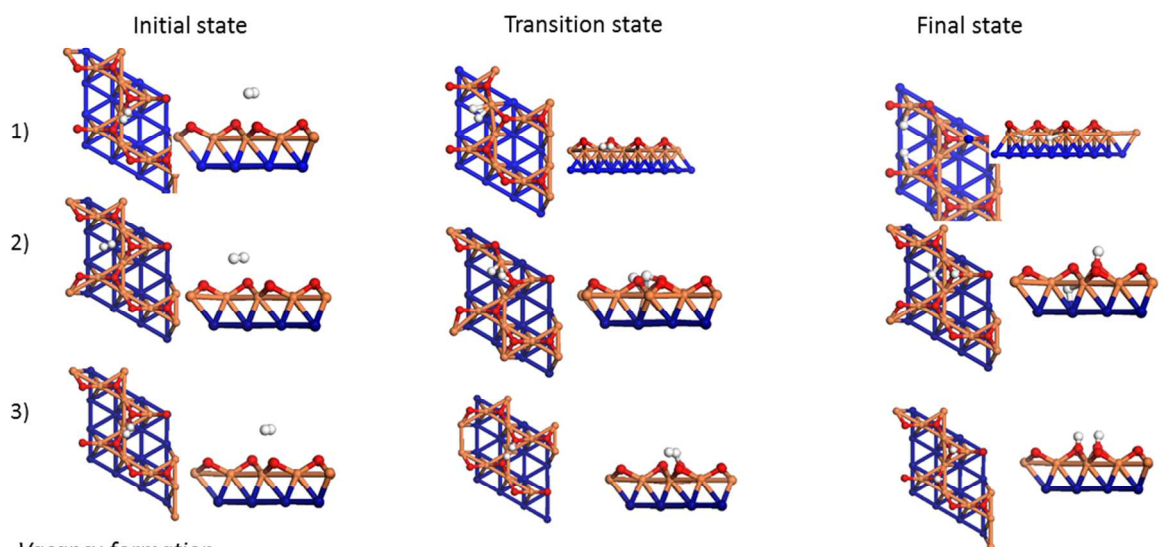

*Vacancy formation*

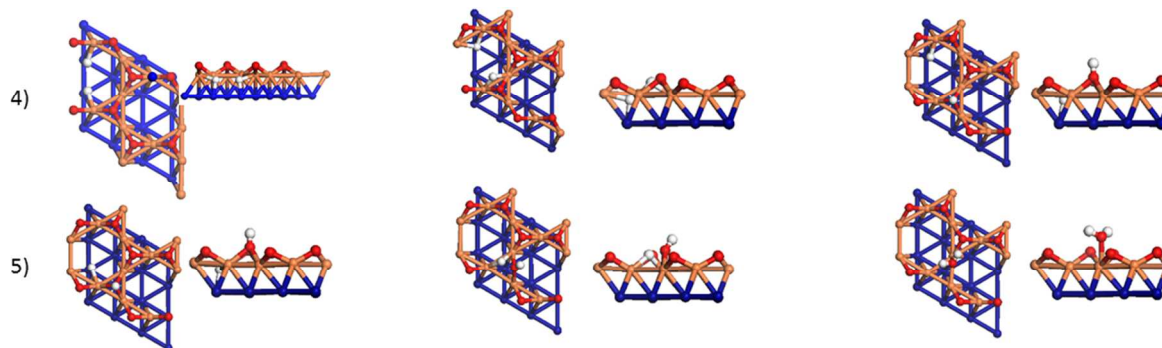

**Figure S5.** Optimized structures of initial, transition, and final states that correspond to reactions in Table S5. Blue atoms - Pt, orange atoms - Co, red atoms - oxygen, brown atoms - carbon. The figure continues on the next page.

*HMF-to-BHMF conversion*

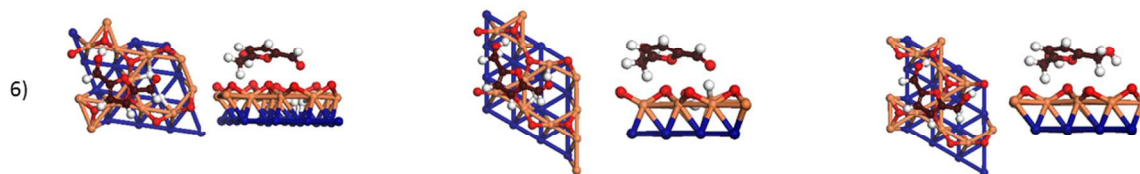

*BHMF-to-BHMMF conversion*

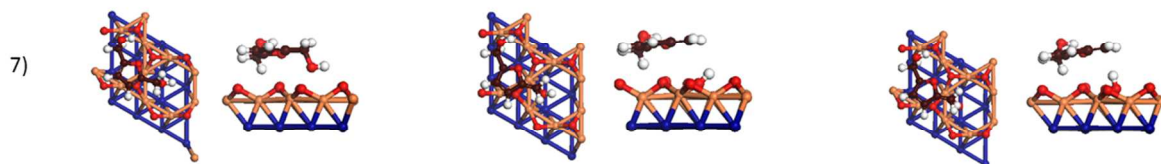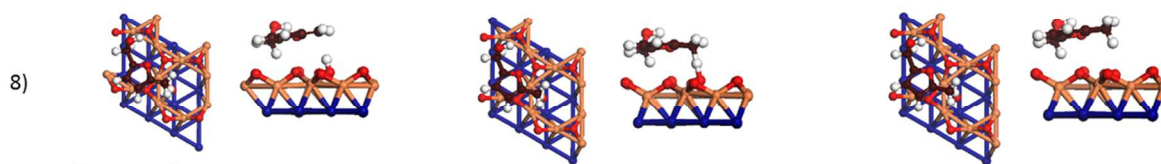

*O removal*

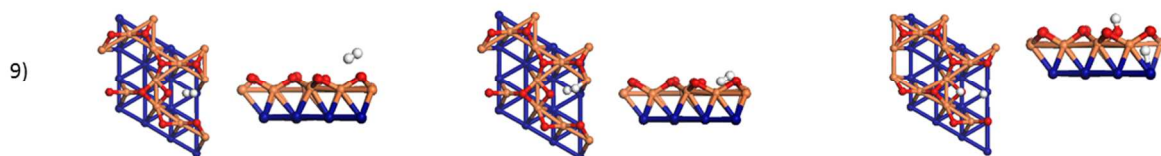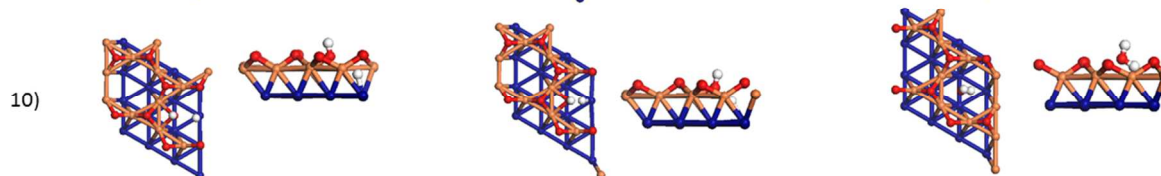

*BHMF-to-BHMMF conversion over a vacancy*

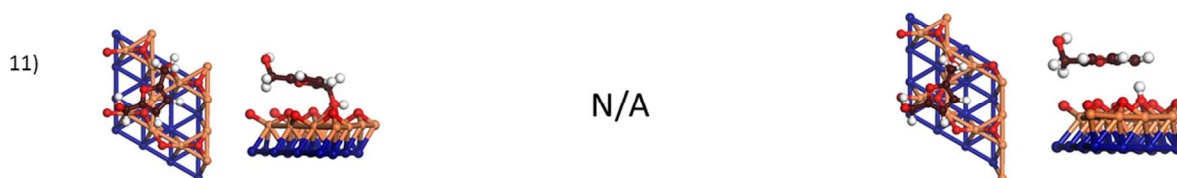

N/A

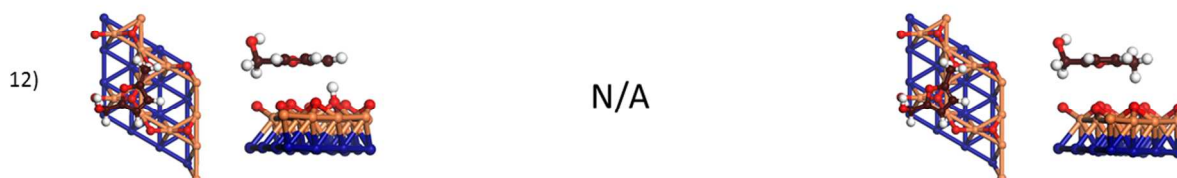

N/A

**Figure S5.** Follow the last page.

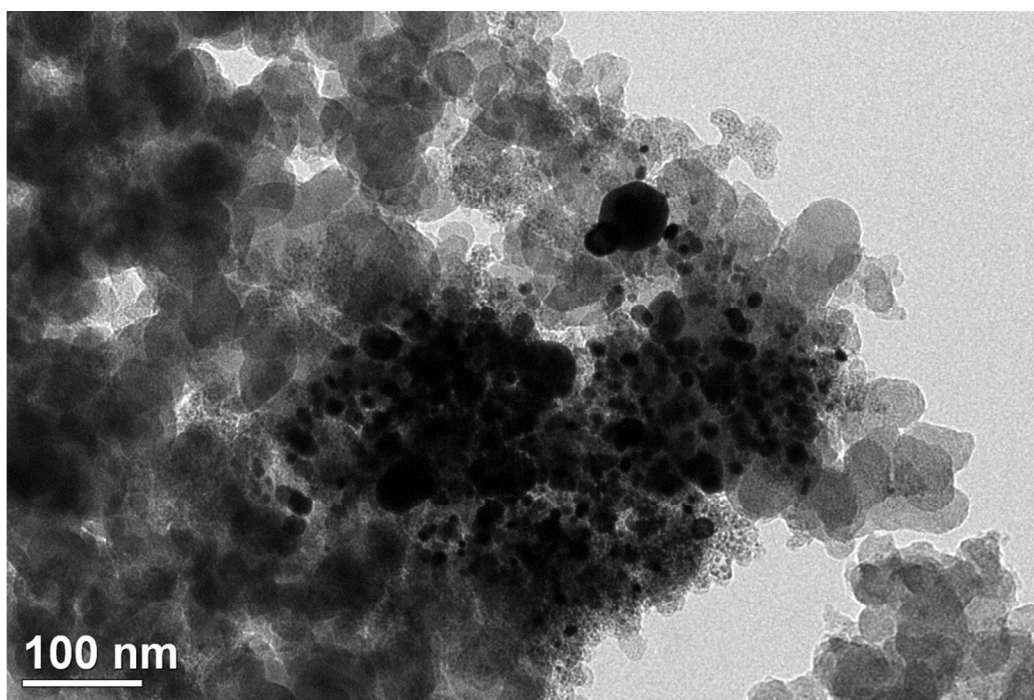

**Figure S6.** TEM images of 10-wt%  $\text{Pt}_3\text{Co}_2/\text{C}$  prepared by wet impregnation method.



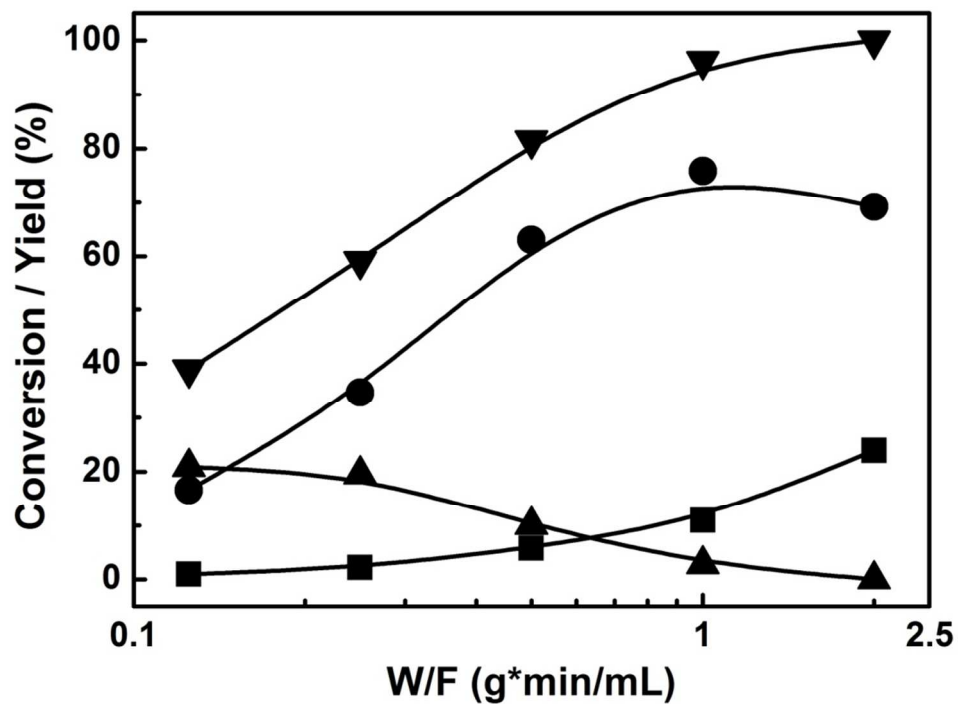

**Figure S7.** Conversion and product distribution for the HDO reaction of HMF over impregnated 10-wt% Pt<sub>3</sub>Co<sub>2</sub>/C, as a function of reactor space time. Reaction conditions: 33 bar and 160 °C. (▼) HMF conversion, (▲) product group B, (●) DMF, (■) product group D

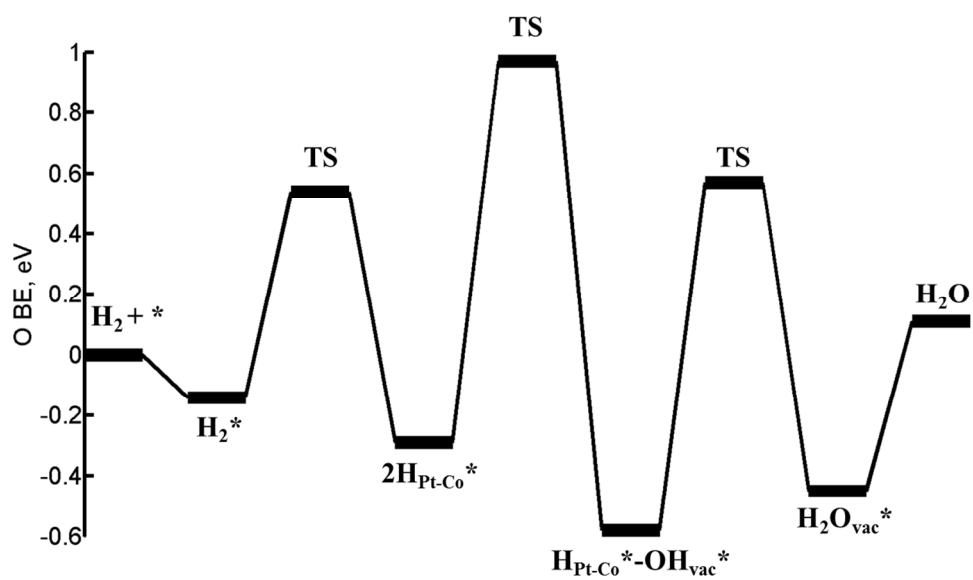

**Figure S8.** Energy diagram for vacancy formation. Notations correspond to Table S5.

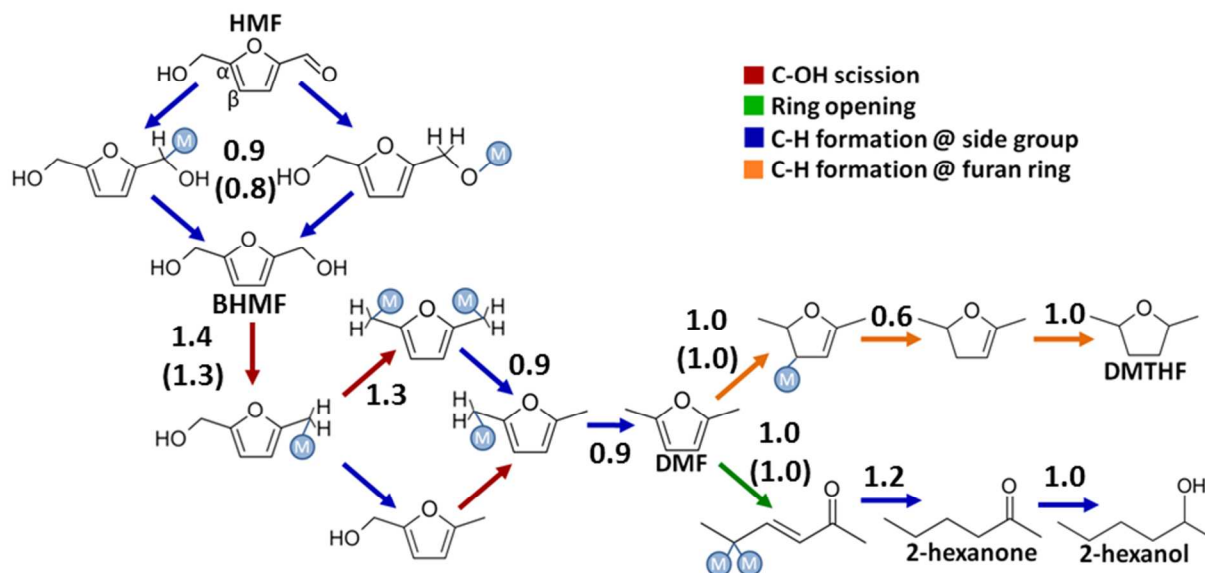

**Figure S9.** Overall reaction network considered for HMF hydrogenolysis to DMF and its side reactions. Numbers are the highest reaction barriers estimated using first principles screening methods<sup>1</sup>. Numbers in parentheses are DFT-refined values.

## Section S1. Preparation of nanocrystal catalysts

To prepare 2.5 nm Pt NCs, 314 mg of platinum acetylacetonate (Acros, 98%) was dissolved in 40 mL of trioctylamine (Sigma-Aldrich, 97 %), 10.9 mL of oleylamine (Sigma-Aldrich, 70 %), 2.6 mL of oleic acid (Sigma-Aldrich, 90 %), and 0.9 mL of trioctylphosphine (Acros Organics, 97 %). The reaction mixture was kept under vacuum at 80 °C for 30 minutes and then heated up to 300 °C at a rate of 10 °C/min. After 30 minutes, the reaction mixture cooled down to room temperature. After then, into the reaction mixture, 40 mL of toluene was added. The mixture was divided into 6 centrifuge tubes (50 mL) and 30 mL of isopropanol and 5 mL of ethanol were added. After 2 minutes of centrifugation at 6000 rpm, the supernatant was removed and the precipitate was able to be re-dispersed in hexane or toluene. After washing the excess amount of oleic acid, oleylamine, and trioctylamine by isopropanol, the NCs were dispersed in toluene.

To synthesize 3.2 nm Pt<sub>3</sub>Co NCs, we scaled up a method reported by Shevchenko *et al.*<sup>4</sup> 264 mg of platinum acetylacetonate was dissolved in 32 g of hexadecylamine (Acros Organics, 90 %) and 16 mL of diphenyl ether (Sigma-Aldrich, 99 %) in the presence of 672 mg of 1-adamantane carboxylic acid (Acros, 99 %) and 1.04 g of 1,2-hexadecanediol (HDD, Sigma-Aldrich). The reaction mixture was put under vacuum at 80 °C for 30 minutes and then heated at a rate of 10 °C/min. When the temperature reached to 170 °C, 334 mg of Co<sub>2</sub>(CO)<sub>8</sub> (Acros, 95 %) dissolved in 3.2 mL of 1,2-dichlorobenzene was injected. The reaction mixture was heated further to 230 °C and kept for 40 minutes. After then, the reaction mixture was allowed to cool down and 50 mL of toluene was injected at 200 °C. When the temperature was cooled down to 90 °C, the reaction mixture was divided into 6 centrifuge tubes (50 mL) and 30 mL of isopropanol, which was prepared to be warm (~ 50 °C), was added to each centrifuge tube. After 2 minutes of centrifugation at 6000 rpm, the supernatant was removed and the precipitate was easily dispersible in non-polar solvent such as hexane and toluene. After washing the colloid with isopropanol 2-3 times, the NCs were kept in hexane.

For 3.6 nm Pt<sub>3</sub>Co<sub>2</sub> NCs, we modified the reaction method for Pt<sub>3</sub>Co NCs. 32 g of hexadecylamine was replaced by 41 mL of oleylamine, 16 mL of diphenyl ether by 16 mL of 1-octadecene (Acros, 90 %), and HDD was not added. After vacuum at 80 °C for 30 minutes, the reaction mixture was heated to 300 °C. At 170 °C, the same amount of Co<sub>2</sub>(CO)<sub>8</sub> was injected. After 30 minutes at 300 °C, the reaction mixture cooled down to room temperature and 50 mL of hexane was added. The other washing process was same as described in the reaction for Pt<sub>3</sub>Co NCs.

To prepare NC catalyst, NCs in 20 mL of hexane were mixed with carbon powder (Cabot, Vulcan XC72R) in a 50 mL centrifuge tube by sonication. The metal loading was 10 wt %. After 15 minutes of sonication, the solution was centrifuged at 6000 rpm for 1 minute. The supernatant should be transparent and removed. Then, the powder was washed with 20 mL of isopropanol and centrifuged again. Then, the powder was dried in a vacuum oven for overnight at 50 °C. To increase catalytic activity of NCs, the powder went through surface cleaning processes. For this purpose, the dry powder was treated with O<sub>2</sub> plasma for 15 minutes. After then, the powder was put into a furnace at 500 °C and taken out after 1 minute. The resulting powder was gone through all the HDO reactions.

## Section S2. Estimation of average coordination numbers and oxidation state

We estimate average Pt coordination numbers of a core/shell nanoparticle for comparison with XAS results according to the following equation:

$$CN_{av} = x_{bulk} \times CN_{bulk} + x_{subsurf,step} \times CN_{subsurf,step} + x_{subsurf,ter} \times CN_{subsurf,ter}$$

Here  $CN_{av}$  is the average coordination number (Pt-Co or Pt-Pt);  $CN_{bulk}$ ,  $CN_{subsurf,step}$ , and  $CN_{subsurf,ter}$  are coordination numbers in the bulk and the subsurface layer under a step site and under a terrace, respectively; and  $x$  is the corresponding fraction of atoms of a given type (Co or Pt). We compute  $CN_{bulk}$  as

$$CN_{bulk,i} = 12 \times y_i$$

Here 12 is a total coordination number in the bulk;  $y_i$  is the bulk fraction of a metal  $i$  (Pt or Co), as found from the overall nanoparticle composition, minus the number of surface Co atoms (see below). In the subsurface layer under a terrace, metal atoms are in contact with the core Pt-Co alloy (total coordination number 9 for an ideal  $Co_3O_2/Pt(111)$  structure) and the  $Co_3O_2$  surface oxide layer on top. Accordingly, the CNs are calculated as

$$CN_{subsurf,Pt-Pt,ter} = 9 \times y_{Pt};$$

$$CN_{subsurf,Pt-Co,ter} = 9 \times y_{Co} + \frac{1}{4} \times 3 + \frac{3}{4} \times 2$$

The factors 1/4 and 3/4 reflect the fact that among every 4 atoms in a subsurface layer of a (4x4) supercell, one is bound to 3 Co atoms and three to 2 Co atoms of a surface oxide. The sublayer CNs under step sites are calculated assuming a Pt(211) geometry, as

$$CN_{subsurf,Pt-Pt,step} = 7 \times y_{Pt};$$

$$CN_{subsurf,Pt-Co,step} = 7 \times y_{Co} + 5$$

Here 7 and 5 are the numbers of non-surface and surface neighbors, respectively.

We estimate the fraction of Pt and Co atoms in each layer by approximating the nanoparticle as a sphere. The total number of atoms is calculated by dividing the particle volume by the volume of a primitive unit cell (dimensions using the XRD-based lattice constant). For a  $Pt_3Co_2$  NC with a 3.7 nm diameter, the number of atoms equals 1827. The number of surface atoms is computed by dividing the particle surface area by a per-atom area in a Pt(111) (4x4) supercell with dimensions corresponding to the  $Pt_3Co_2$  lattice constant. Accordingly, we find the 3.7 nm-particle dispersion to be 36%, close to values obtained with a different method<sup>2</sup>. The number of atoms in the subsurface layer was calculated in a similar fashion using a nanoparticle radius of the actual radius minus the distance between subsurface and surface layers (2.041 Å, as in the  $Co_3O_2/Pt(111)$  slab). To obtain the total number of surface Co atoms, we scale the number of 70% of surface sites by a factor of 12/16 to reflect the fact that every 12 Co atoms in a  $Co_3O_2$  honeycomb geometry occupy area equivalent to 16 surface Co (or Pt) atoms in a close-packed configuration. We assume the number of sublayer atoms under step sites to be equal to the number of step sites.

Results of model-based calculations are given in Tables S6 and S7.

## Section S3. Relative kinetic stability estimation of $Co_3O_2$ monolayer at 250 °C, 1 atm $H_2$ vs. 160 °C, 33 atm $H_2$

We calculate the vacancy formation rate as

$$r = k_{O+H \rightarrow OH} \theta_{2H}$$

Here  $k_{O+H\rightarrow OH}$  is the rate constant for the OH formation reaction;  $\theta_{2H}$  is the surface coverage of dissociated  $H_2$  molecules. The coverage is found assuming equilibrium between the chemical potentials of an adsorbed state, gaseous  $H_2$  and vacant surface sites ( $\mu_{2H}$ ,  $\mu_{H_2,gas}$ , and  $\mu_*$ , respectively):

$$\mu_{2H} = \mu_{H_2,gas} + \mu_*$$

The chemical potentials are expressed in terms of surface coverages and  $H_2$  pressure:

$$\mu_{2H}^0 + RT \ln \theta_{2H} = \mu_{H_2,gas}^0 + RT \ln \frac{P_{H_2,bar}}{1 \text{ bar}} + \mu_*^0 + RT \ln \theta_*$$

Here a naught in a superscript denotes quantities at a given temperature (160 or 250 °C) and 1 bar  $H_2$  pressure. The coverage of 2H species is calculated in terms of Gibbs free energy of adsorption  $\Delta G_{H_2,ads}$ , assuming  $\theta_* = 1$ , as

$$\theta_{2H} = \exp\left(-\frac{\Delta G_{H_2,ads}}{RT}\right) \times \frac{P_{H_2,bar}}{1 \text{ bar}}$$

The reaction rate constant is calculated according to the transition state theory:

$$k_{O+H\rightarrow OH} = \frac{k_B T}{h} \exp\left(-\frac{\Delta G_{O+H\rightarrow OH}^\ddagger}{RT}\right)$$

Zero point energies and temperature corrections were accounted for in Gibbs free energy calculations by assuming that all surface species only possess vibrational degrees of freedom.

Following homolytic splitting of the  $H_2$  molecule, one H atom transfers to a neighboring O atom to form OH (1.3 eV barrier). A second H atom attacks OH and produces water (1.2 eV barrier), which subsequently desorbs. The transition state of hydroxyl formation,  $O+H\rightarrow OH$ , is the least stable (Figure S8), suggesting OH formation to be the rate-limiting step of a vacancy formation. We find its rate at 160 °C and 33 bar  $H_2$  to be equal to  $5.26 \cdot 10^{-3} \text{ s}^{-1}$  (Table S8), assuming the catalyst is in equilibrium with the  $H_2$  gas. Under *in situ* XAS conditions (250 °C and 1 bar  $H_2$ ), the corresponding vacancy formation rate is greater by a factor of two ( $1.15 \cdot 10^{-2} \text{ s}^{-1}$ ). Once formed, the vacancy is easily reoxidized by BHMF-to-HMMF reactions (Table S5, reactions 11-12) with a rate of  $4 \cdot 10^{10} \text{ s}^{-1}$  (0.2 eV C-O scission barrier). This analysis provides a rationalization as to why the  $Co_3O_2$  surface oxide is stable in a reducing reaction environment.

## Section S4. HMF conversion pathways on Pt(111)

Figure S9 shows the reaction network on Pt(111). HMF is hydrogenated to BHMF, which then undergoes dehydroxylation and hydrogenation to DMF and side reactions leading to DMTHF and 2-hexanol (HMF ring hydrogenation is unimportant based on experimental data). The reaction network consists of 31 elementary reactions, including C-H and O-H formation at side groups, C-H formation at the furan ring, C-OH scission, and ring opening via C-O scission. We use first principles-based screening methods to fast-estimate the thermochemistry and reaction barriers<sup>1</sup>. Reactions with highest barriers are subsequently refined using DFT. Results are generally consistent with general knowledge that Pt is a great hydrogenation catalyst of aliphatic hydrocarbons and carbonyl containing compounds (aldehydes and ketones). Dehydroxylation is slow with the barrier of 1.4 eV. The preferred ring-opening path entails the C-O scission followed by hydrogenation of the  $\alpha$ -C rather than ring activation followed by ring opening. Ring opening has a moderate barrier of 1 eV. The associated ring closing barrier is only 0.3 eV, suggesting that ring opening is reversible. Subsequent hydrogenations possess a maximum barrier of 1.2 eV, slightly higher than that of ring opening. The preferred sequence for

DMF ring hydrogenation is  $\alpha_1$ -C,  $\beta_1$ -C,  $\beta_2$ -C, and  $\alpha_2$ -C, regardless of the metal surface, but other sequences are also energetically competitive. The initial hydrogenation barrier is 1.0 eV. Subsequent hydrogenations have barriers of 0.6, 1.0, and 1.0 eV.

## References

1. (a) Vorotnikov, V.; Vlachos, D. G. *J. Phys. Chem. C* **2015**, *119*, 10417-10426;  
(b) Wang, S.; Vorotnikov, V.; Sutton, J. E.; Vlachos, D. G. *ACS Catal.* **2014**, *4*, 604-612.
2. Pérez, O.-L.; Romeu, D.; Yacamán, M. J. *J. Catal.* **1983**, *79*, 240-241.
